# Supplementary material for: Transcriptomic and Functional Approaches Unveil the Role of tmRNA in Zinc Acetate Mediated Levofloxacin Sensitivity in Helicobacter Pylori
Source: Research Square preprint supplement (doi:10.21203/rs.3.rs-1331647/v1), 2022-02-08
Supplement: Supplementary file 1 [file ffbe2ebb5ebdc82742082b3e.pdf]

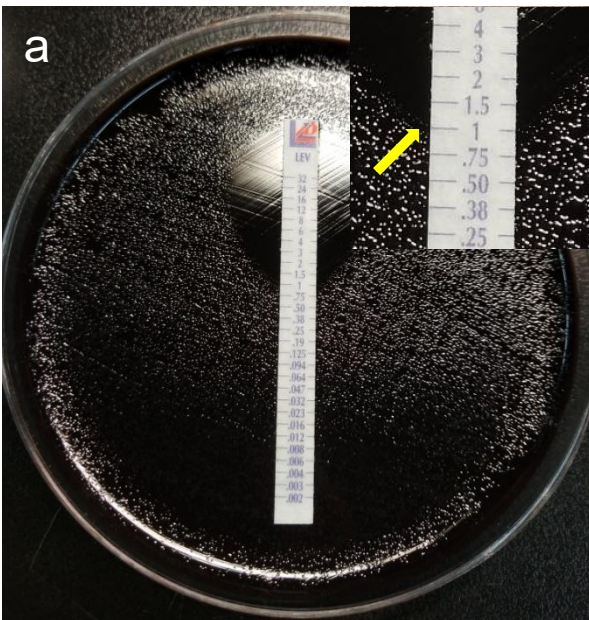

Control: 1.0-1.5 µg/ml

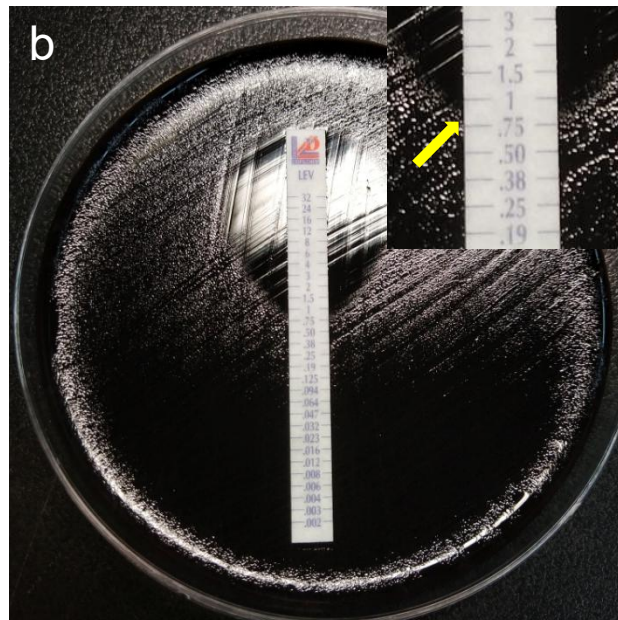

Polaprezinc: 0.75-1.0 µg/ml

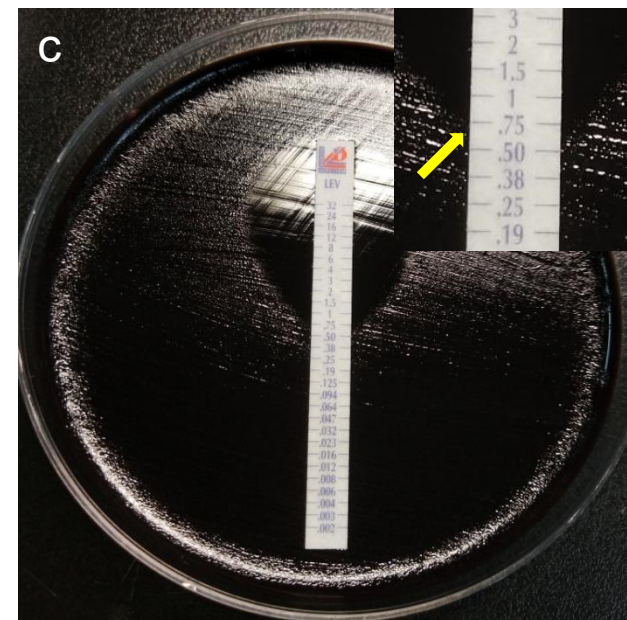

Zinc acetate: 0.5-0.75 µg/ml

**Supplementary Figure 1.** Effects of zinc compounds on the sensitivity of *H. pylori* NCTC 11637 to levofloxacin. The MIC of levofloxacin was (a) 1.0-1.5 µg/ml in control group, (b) 0.75-1.0 µg/ml in polaprezinc group, (c) 0.5-0.75 µg/ml in zinc acetate group.

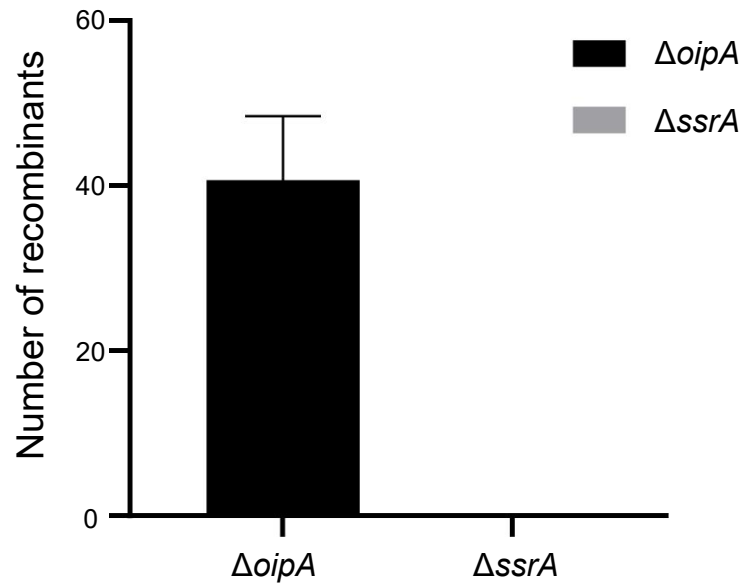

**Supplementary Figure 2.** The number of recombinants obtained for NCTC 11637 following introduction of the plasmids that knock out *ssrA* and *oipA*.  $\Delta oipA$  was used as a positive control. Recombinants were the colonies obtained after transformation and selected on kanamycin-contained plates. The vertical axis corresponds to the number of recombinants.
